# Supplementary material
Source: publisher site journal article supplement (https://www.dovepress.com/article/287523)
Supplement: Supplementary file 1 [file get_supplementary_file.php]

**Au-Pt nanoparticles formulation as a radiosensitizer with dual effects for radiotherapy**

Song Yang1,2,#, Gaohua Han1,2,#, Quan Chen2,3, Lei Yu1,2, Peng Wang1,2, Qi Zhang1,2, Jiang Dong1,2, Wei Zhang2,4,*, Junxing Huang1,2,*

1Department of Oncology, Taizhou People’s Hospital, Taizhou, Jiangsu, China

2Medical School of Nantong University, Nantong, Jiangsu, China

3Department of [Thoracic](javascript:;) [Surgery](javascript:;), Taizhou People’s Hospital, Taizhou, Jiangsu, China

4Department of Infectious Disease, Taizhou People’s Hospital, Taizhou, Jiangsu, China

#These authors contributed equally to this work.

***Corresponding author:**

Wei Zhang, Department of Infectious Disease, Taizhou People’s Hospital, No. 399, South Hailing Road, Taizhou, 225300, Jiangsu, China; Medical School of Nantong University, No. 19, Qixiu Road, Nantong, 226000, Jiangsu, China

E-mail: [zw562652291@126.com](mailto:zw562652291@126.com) Tel.: 86-0523-86606739

Junxing Huang, Department of Oncology, Taizhou People’s Hospital, No. 399, South Hailing Road, Taizhou, 225300, Jiangsu, China; Medical School of Nantong University, No. 19, Qixiu Road, Nantong, 226000, Jiangsu, China

E-mail: [hjxtz@sina.com](mailto:hjxtz@sina.com) Tel.: 86-0523-86606739

**Supplementary Appendix**

[Ultraviolet](javascript:;) [absorption](javascript:;) [spectrum](javascript:;) graph

O2 generating graph

CT fluorescence graphs

Surgical tumors graph

H&E staining graphs for the main organs


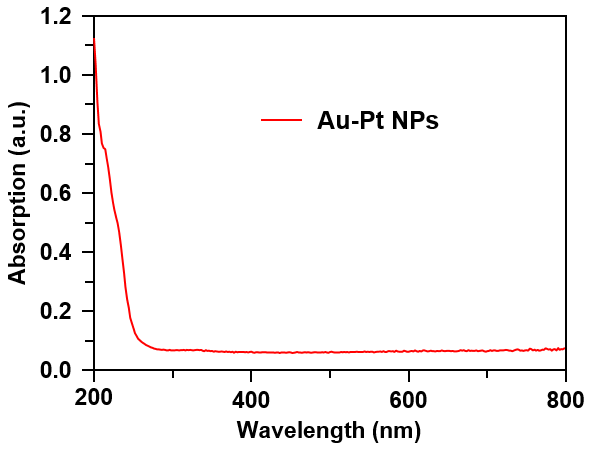


**Fig. S1.** The [ultraviolet](javascript:;) [absorption](javascript:;) [spectrum](javascript:;) showed that there was no [characteristic](javascript:;) [peak](javascript:;) of Au-Pt NPs.


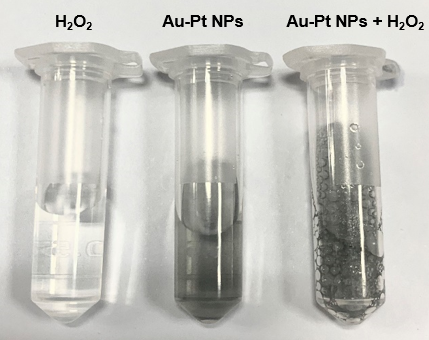


**Fig. S2.** Au-Pt NPs (10 mg/mL) catalyzed H2O2 into O2 promptly. The oxygen production indicated the excellent CAT-like activity of Au-Pt NPs.


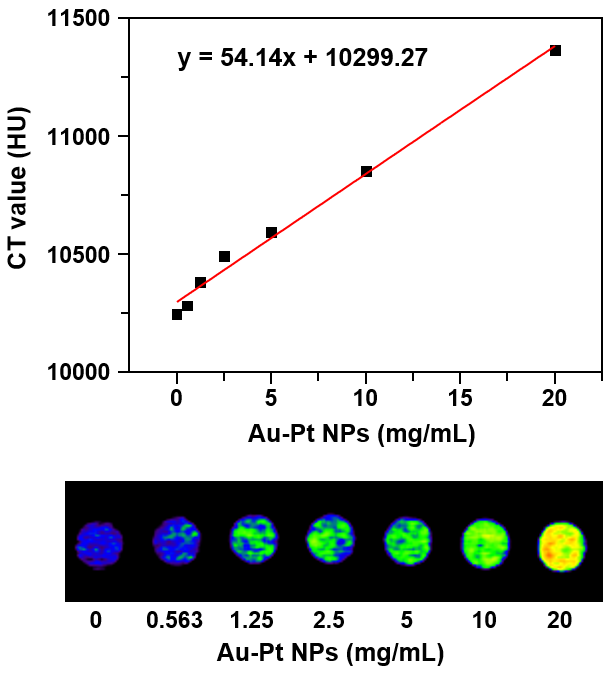


**Fig. S3.** Au-Pt NPs exhibited the ability to be detected with CT fluorescence imaging.


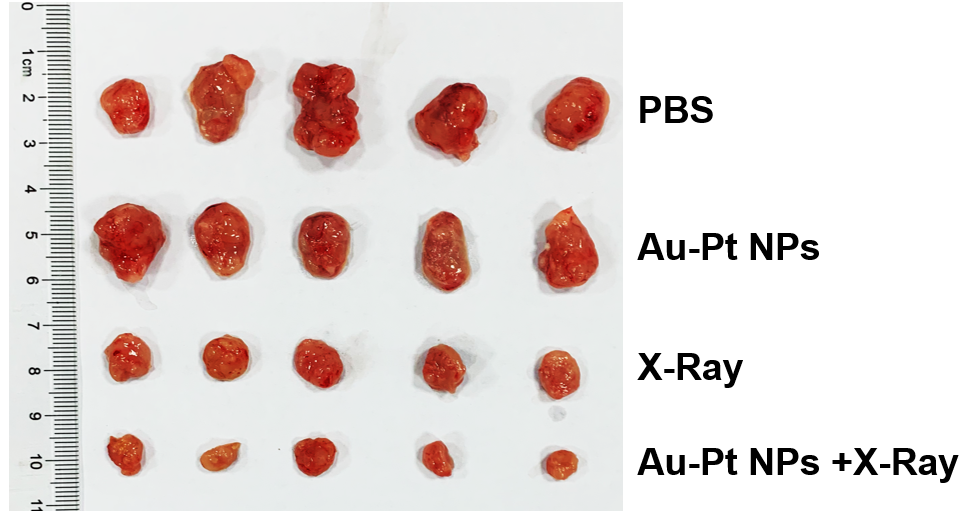


**Fig. S4.** The tumors of four groups from mice by operation: (a) control group (PBS); (b) Au-Pt NPs; (c) X-ray; (d) Au-Pt NPs + X-ray. When sacrificed on day 16, the tumors of the mice from the four groups demonstrated that the size of the tumors in the mice treated with Au-Pt NPs was smaller than in any of the other groups.


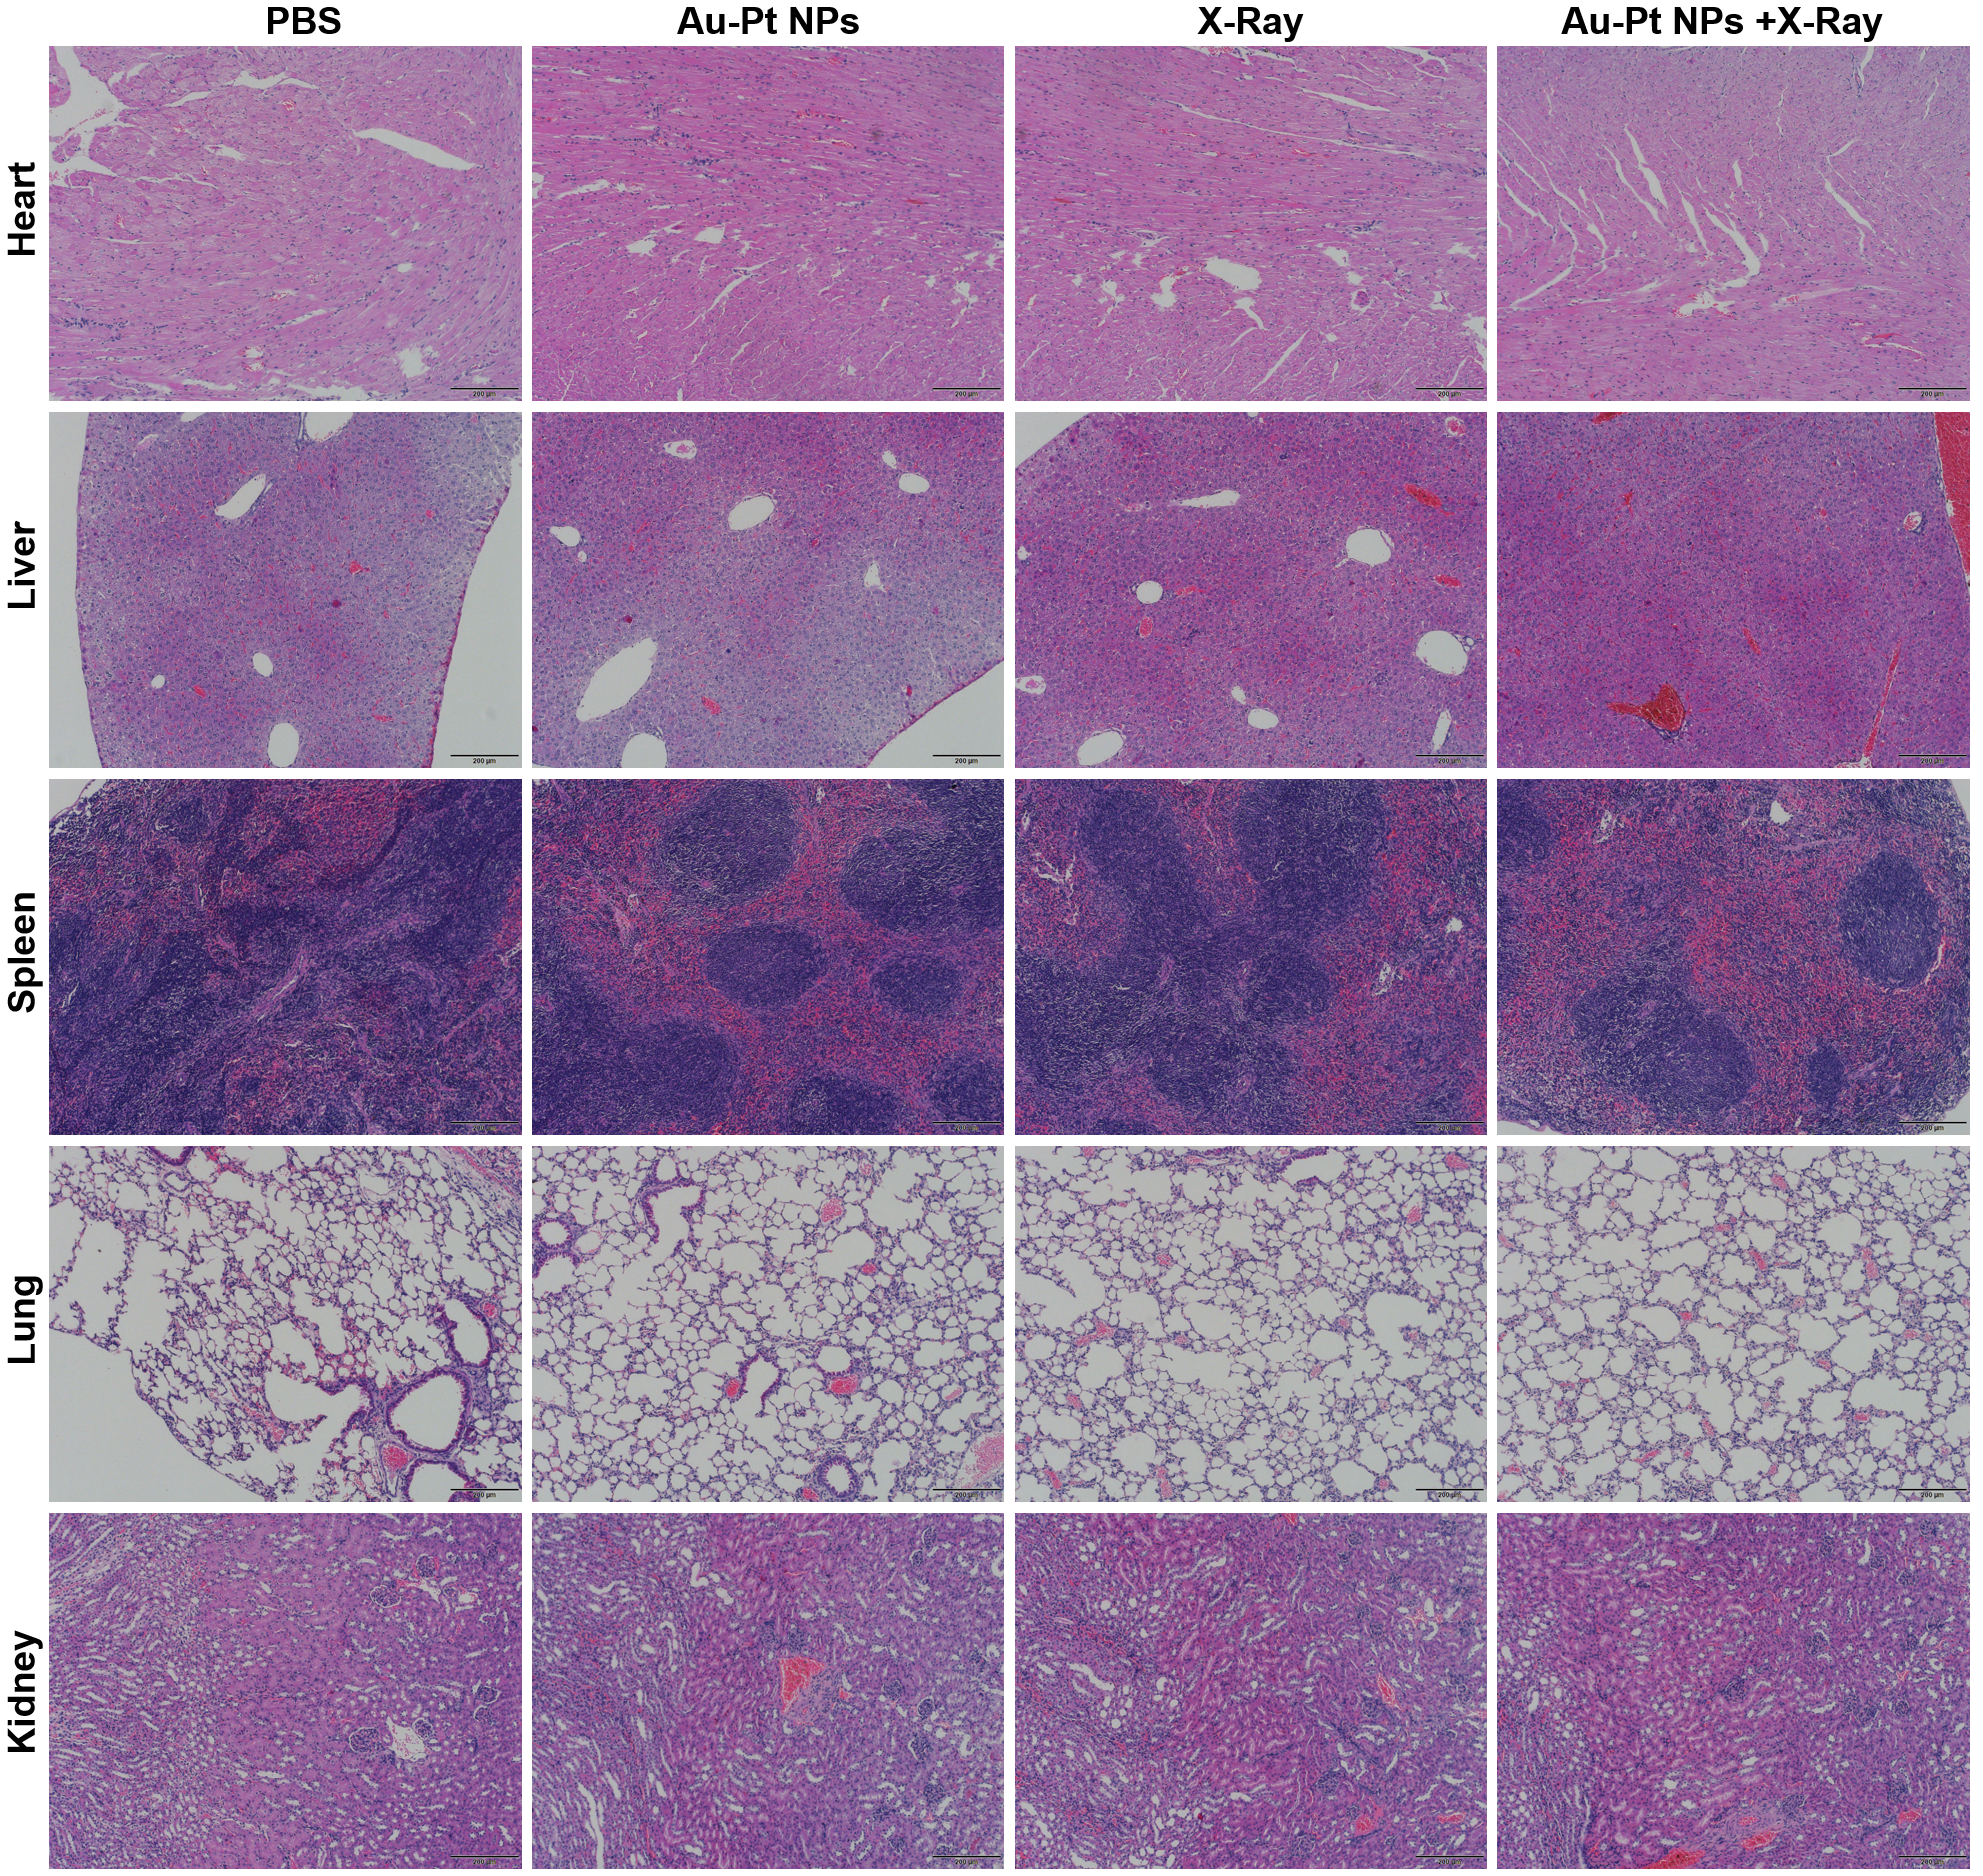


**Fig. S5.** H&E staining of the main organs from mice by operation: (a) control group (PBS); (b) Au-Pt NPs; (c) X-ray; (d) Au-Pt NPs + X-ray. (scale bar: 100 μm). The H&E staining of the main organs from the mice showed no pathological change, which indicated that there was no poisoning of the organisms.
